# Supplementary material for: Comparative Analysis of orf182 Widespread in Chinese Wild Rice Species for Hybrid Rice Breeding
Source: Research Square preprint supplement (doi:10.21203/rs.3.rs-7649942/v1), 2025-11-05
Supplement: Supplementary file 1 [file 3307dc5528b2ee6613e3276b.xlsx]

## Sheet: Sheet1
#Structural annotations	GD9	GD9	GD9	GD4	GD4	GD4	GD5	GD5	GD5	GD7	GD7	GD7	GX4	GX4	GX4	GX34	GX34	GX34	GX44	GX44	GX44	GX46	GX46	GX46	GX51	GX51	GX51	JX2	JX2	JX2	JX5	JX5	JX5
#Variation_type	Count	Length_ref	Length_qry	Count	Length_ref	Length_qry	Count	Length_ref	Length_qry	Count	Length_ref	Length_qry	Count	Length_ref	Length_qry	Count	Length_ref	Length_qry	Count	Length_ref	Length_qry	Count	Length_ref	Length_qry	Count	Length_ref	Length_qry	Count	Length_ref	Length_qry	Count	Length_ref	Length_qry
Syntenic regions	3	84369	85920	2	92199	92154	2	58413	60013	2	58413	60006	5	130916	131014	2	82946	82968	3	84369	85920	3	84369	85920	3	84281	86060	3	141880	142396	2	142711	142782
Inversions	3	290178	204156	4	252819	146752	3	290178	306899	3	290178	306887	1	56827	57297	3	246689	298749	2	187013	301392	2	294448	215490	2	187013	301296	1	158008	189920	2	244768	162777
Translocations	3	37552	46178	6	77461	77432	2	25172	33794	2	25172	33794	3	228546	292465	2	184484	197365	4	43871	43880	2	21317	21326	4	43871	43880	6	69000	112771	3	31766	31651
Duplications (reference)	4	62450	-	2	14987	-	6	100786	-	6	100786	-	8	139911	-	3	165201	-	8	162320	-	6	90592	-	8	162320	-	1	10878	-	3	6373	-
Duplications (query)	9	-	197062	5	-	161521	6	-	114368	6	-	114356	17	-	240156	4	-	73525	0	-	0	4	-	205536	0	-	0	10	-	61310	7	-	148281
Not aligned (reference)	8	16176	-	6	59034	-	8	16176	-	8	16176	-	8	67375	-	4	52937	-	8	19293	-	6	16976	-	8	19381	-	9	110831	-	10	41861	-
Not aligned (query)	10	-	26764	6	-	16245	7	-	19213	7	-	19213	18	-	47301	3	-	9389	3	-	7310	4	-	10295	3	-	7310	13	-	30431	7	-	5414
#Sequence annotations
#Variation_type	Count	Length_ref	Length_qry	Count	Length_ref	Length_qry	Count	Length_ref	Length_qry	Count	Length_ref	Length_qry	Count	Length_ref	Length_qry	Count	Length_ref	Length_qry	Count	Length_ref	Length_qry	Count	Length_ref	Length_qry	Count	Length_ref	Length_qry	Count	Length_ref	Length_qry	Count	Length_ref	Length_qry
SNPs	154	154	154	212	212	212	141	141	141	165	165	165	200	200	200	198	198	198	168	168	168	166	166	166	192	192	192	206	206	206	134	134	134
Insertions	78	-	1821	57	-	1816	75	-	1814	75	-	1807	76	-	786	64	-	1256	69	-	1761	67	-	1763	74	-	1999	63	-	1839	27	-	53
Deletions	40	134	-	34	128	-	35	93	-	35	93	-	38	101	-	37	69	-	33	128	-	32	119	-	36	134	-	37	105	-	61	862	-
Copygains	1	-	8580	1	-	28807	1	-	8580	1	-	8580	2	-	91041	1	-	44601	2	-	131710	0	-	0	2	-	131614	1	-	50354	0	-	0
Copylosses	1	67928	-	0	0	-	0	0	-	0	0	-	0	0	-	0	0	-	0	0	-	1	67932	-	0	0	-	0	0	-	0	0	-
Highly diverged	4	36478	9479	6	149296	12745	4	67828	84450	4	67828	84438	3	47159	25986	6	196075	215270	2	20445	7143	3	70834	50896	3	20600	7294	5	62725	94473	4	136711	55481
Tandem repeats	0	0	0	0	0	0	0	0	0	0	0	0	0	0	0	0	0	0	0	0	0	0	0	0	0	0	0	0	0	0	0	0	0
