# Supplementary material for: Comparative Analysis of orf182 Widespread in Chinese Wild Rice Species for Hybrid Rice Breeding
Source: Research Square preprint supplement (doi:10.21203/rs.3.rs-7649942/v1), 2025-11-05
Supplement: Supplementary file 2 [file 7a73ff41c8254f53d9235b7b.xlsx]

## Sheet: Sheet1
Series number	Accesion number	Scientific name Species	Genome type	Origin(Province)	Voucher specimens
GX1	551	O.ruffipogon	AA	China(guangxi)	JXSNKY-GX-0001
GX2	562	O.ruffipogon	AA	China(guangxi)	JXSNKY-GX-0002
GX3	708	O.ruffipogon	AA	China(guangxi)	JXSNKY-GX-0003
GX4	802	O.ruffipogon	AA	China(guangxi)	JXSNKY-GX-0004
GX5	870	O.ruffipogon	AA	China(guangxi)	JXSNKY-GX-0005
GX6	1006	O.ruffipogon	AA	China(guangxi)	JXSNKY-GX-0006
GX7	1106	O.ruffipogon	AA	China(guangxi)	JXSNKY-GX-0007
GX8	1119	O.ruffipogon	AA	China(guangxi)	JXSNKY-GX-0008
GX9	1128	O.ruffipogon	AA	China(guangxi)	JXSNKY-GX-0009
GX10	1149	O.ruffipogon	AA	China(guangxi)	JXSNKY-GX-0010
GX11	1158	O.ruffipogon	AA	China(guangxi)	JXSNKY-GX-0011
GX12	1162	O.ruffipogon	AA	China(guangxi)	JXSNKY-GX-0012
GX13	1182	O.ruffipogon	AA	China(guangxi)	JXSNKY-GX-0013
GX14	1211	O.ruffipogon	AA	China(guangxi)	JXSNKY-GX-0014
GX15	1230	O.ruffipogon	AA	China(guangxi)	JXSNKY-GX-0015
GX16	1238	O.ruffipogon	AA	China(guangxi)	JXSNKY-GX-0016
GX17	1260	O.ruffipogon	AA	China(guangxi)	JXSNKY-GX-0017
GX18	1271	O.ruffipogon	AA	China(guangxi)	JXSNKY-GX-0018
GX19	1290	O.ruffipogon	AA	China(guangxi)	JXSNKY-GX-0019
GX20	1300	O.ruffipogon	AA	China(guangxi)	JXSNKY-GX-0020
GX21	1309	O.ruffipogon	AA	China(guangxi)	JXSNKY-GX-0021
GX22	1319	O.ruffipogon	AA	China(guangxi)	JXSNKY-GX-0022
GX23	1357	O.ruffipogon	AA	China(guangxi)	JXSNKY-GX-0023
GX24	1367	O.ruffipogon	AA	China(guangxi)	JXSNKY-GX-0024
GX25	1373	O.ruffipogon	AA	China(guangxi)	JXSNKY-GX-0025
GX26	1380	O.ruffipogon	AA	China(guangxi)	JXSNKY-GX-0026
GX27	1387	O.ruffipogon	AA	China(guangxi)	JXSNKY-GX-0027
GX28	1393	O.ruffipogon	AA	China(guangxi)	JXSNKY-GX-0028
GX29	1400	O.ruffipogon	AA	China(guangxi)	JXSNKY-GX-0029
GX30	1431	O.ruffipogon	AA	China(guangxi)	JXSNKY-GX-0030
GX31	1441	O.ruffipogon	AA	China(guangxi)	JXSNKY-GX-0031
GX32	1510	O.ruffipogon	AA	China(guangxi)	JXSNKY-GX-0032
GX33	1520	O.ruffipogon	AA	China(guangxi)	JXSNKY-GX-0033
GX34	N567	O.ruffipogon	AA	China(guangxi)	JXSNKY-GX-0034
GX35	N568	O.ruffipogon	AA	China(guangxi)	JXSNKY-GX-0035
GX36	N570	O.ruffipogon	AA	China(guangxi)	JXSNKY-GX-0036
GX37	N571	O.ruffipogon	AA	China(guangxi)	JXSNKY-GX-0037
GX38	N573	O.ruffipogon	AA	China(guangxi)	JXSNKY-GX-0038
GX39	N575	O.ruffipogon	AA	China(guangxi)	JXSNKY-GX-0039
GX40	N576	O.ruffipogon	AA	China(guangxi)	JXSNKY-GX-0040
GX41	K1	O.ruffipogon	AA	China(guangxi)	JXSNKY-GX-0041
GX42	K10	O.ruffipogon	AA	China(guangxi)	JXSNKY-GX-0042
GX43	K30	O.ruffipogon	AA	China(guangxi)	JXSNKY-GX-0043
GX44	K40	O.ruffipogon	AA	China(guangxi)	JXSNKY-GX-0044
GX45	K60	O.ruffipogon	AA	China(guangxi)	JXSNKY-GX-0045
GX46	K70	O.ruffipogon	AA	China(guangxi)	JXSNKY-GX-0046
GX47	K80	O.ruffipogon	AA	China(guangxi)	JXSNKY-GX-0047
GX48	K90	O.ruffipogon	AA	China(guangxi)	JXSNKY-GX-0048
GX49	K100	O.ruffipogon	AA	China(guangxi)	JXSNKY-GX-0049
GX50	K110	O.ruffipogon	AA	China(guangxi)	JXSNKY-GX-0050
GX51	K130	O.ruffipogon	AA	China(guangxi)	JXSNKY-GX-0051
GX52	K140	O.ruffipogon	AA	China(guangxi)	JXSNKY-GX-0052
GX53	K150	O.ruffipogon	AA	China(guangxi)	JXSNKY-GX-0053
GX54	K200	O.ruffipogon	AA	China(guangxi)	JXSNKY-GX-0054
GX55	K210	O.ruffipogon	AA	China(guangxi)	JXSNKY-GX-0055
GX56	K280	O.ruffipogon	AA	China(guangxi)	JXSNKY-GX-0056
GX57	K880	O.ruffipogon	AA	China(guangxi)	JXSNKY-GX-0057
GD1	GW1(26W-12)	O.ruffipogon	AA	China(guangdong)	JXSNKY-GD-0001
GD2	GW3(26W-78)	O.ruffipogon	AA	China(guangdong)	JXSNKY-GD-0002
GD3	GW6(26W-121)	O.ruffipogon	AA	China(guangdong)	JXSNKY-GD-0003
GD4	GW8(26W-112)	O.ruffipogon	AA	China(guangdong)	JXSNKY-GD-0004
GD5	GW11(26W-13)	O.ruffipogon	AA	China(guangdong)	JXSNKY-GD-0005
GD6	GW12(26W-143)	O.ruffipogon	AA	China(guangdong)	JXSNKY-GD-0006
GD7	GW14(26W-132)	O.ruffipogon	AA	China(guangdong)	JXSNKY-GD-0007
GD8	GW18(26W-25)	O.ruffipogon	AA	China(guangdong)	JXSNKY-GD-0008
GD9	GW22(26W-95)	O.ruffipogon	AA	China(guangdong)	JXSNKY-GD-0009
GD10	GW32(18W-95)	O.ruffipogon	AA	China(guangdong)	JXSNKY-GD-0010
GD11	GW34(18W-60）	O.ruffipogon	AA	China(guangdong)	JXSNKY-GD-0011
GD12	GW78(7W-89)	O.ruffipogon	AA	China(guangdong)	JXSNKY-GD-0012
GD13	GW82(7W-178)	O.ruffipogon	AA	China(guangdong)	JXSNKY-GD-0013
JX1	DX23	O.ruffipogon	AA	China(jiangxi)	JXSNKY-JX-0001
JX2	DX50	O.ruffipogon	AA	China(jiangxi)	JXSNKY-JX-0002
JX3	DX190	O.ruffipogon	AA	China(jiangxi)	JXSNKY-JX-0003
JX4	DX196	O.ruffipogon	AA	China(jiangxi)	JXSNKY-JX-0004
JX5	DX219	O.ruffipogon	AA	China(jiangxi)	JXSNKY-JX-0005
S1	N104625	O.spontanea	AA	China(unknown)	JXSNKY-IRRI-0001
The wild accessions with number beginning with S,GD,JXwere introduced from the International Rice Research Institute, HuaNan Agricultural University, Jiangxi Academy of Agricultural Sciences,and Guangxi Academy of Agricultural Sciences，respectively, with number beginning withGX were introduced from Guangxi Academy of Agricultural Sciences and Guangxi University
