# Supplementary material for: Comparative Analysis of orf182 Widespread in Chinese Wild Rice Species for Hybrid Rice Breeding
Source: Research Square preprint supplement (doi:10.21203/rs.3.rs-7649942/v1), 2025-11-05
Supplement: Supplementary file 3 [file 95e10b5ecd18221acf7b1a54.xlsx]

## Sheet: Sheet1
Sample
GD4	nad6+orf182	rps1+ccmFn	cox3+atp4	rpl16+rps3	rps12+nad3	rps19+rpl2	nad6+ccmc
GD5	nad6+orf182	rps1+ccmFn	cox3+atp4	rpl16+rps3	rps12+nad3	rps19+rpl2	nad6+ccmc
GD7	nad6+orf182	rps1+ccmFn	cox3+atp4	rpl16+rps3	rps12+nad3	rps19+rpl2	nad6+ccmc
GD9	nad6+orf182	rps1+ccmFn	cox3+atp4	rpl16+rps3	rps12+nad3	rps19+rpl2	nad6+ccmc
GX4	nad6+orf182	rps1+ccmFn		rpl16+rps3	rps12+nad3	rps19+rpl2	nad6+ccmc	rrn5+rrn18
GX34	nad6+orf182	rps1+ccmFn	cox3+atp4	rpl16+rps3	rps12+nad3	rps19+rpl2	nad6+ccmc
GX44	nad6+orf182	rps1+ccmFn	cox3+atp4	rpl16+rps3	rps12+nad3	rps19+rpl2	nad6+ccmc
GX46	nad6+orf182	rps1+ccmFn	cox3+atp4	rpl16+rps3	rps12+nad3	rps19+rpl2	nad6+ccmc		nad5+matR
GX51	nad6+orf182	rps1+ccmFn	cox3+atp4	rpl16+rps3	rps12+nad3	rps19+rpl2	nad6+ccmc		nad5+matR
JX2	nad6+orf182			rpl16+rps3	rps12+nad3	rps19+rpl2	nad6+ccmc
JX5	nad6+orf182	rps1+ccmFn	cox3+atp4	rpl16+rps3	rps12+nad3	rps19+rpl2	nad6+ccmc
