# Supplementary material for: Comparative Analysis of orf182 Widespread in Chinese Wild Rice Species for Hybrid Rice Breeding
Source: Research Square preprint supplement (doi:10.21203/rs.3.rs-7649942/v1), 2025-11-05
Supplement: Supplementary file 4 [file b592e0e9c1d3117cc5c62390.xlsx]

## Sheet: Sheet1
Primer names	primer sequences	Fragment Size(bp)
orf182F	ATGATGAGATTTAGTTCAACG
orf182R	TCATGGGAACCACTTGCTG	549
MS17F	CTGCTTTCTTTCCTTCTGG
MS17R	TCAATCGGCTACTGGTTCT	917
MS35F	AGCAACCTATTTTCCCCAC
MS35R	ACAACTTCAGCTCCCCCTA	931
MS20F	CAACCATCCATCTCAATCC
MS20R	CTGTGAAAGCAAGCGTAGG	377
MS21F	TTGCTGACTGACTGTTTGA
MS21R	GTGGGCCACTTTATGTTGA	369
MS22F	CTTGTTCTGCTTCGTCGTC
MS22R	ACCTATCCTTTTGCTCTTG	1135
MS26F	CCATCTTCATTACTTCCCTA
MS26R	CGACTTTTCTTTACCACTCT	890
MS28F	TTTTGGAGAGTCCTCTGGA
MS28R	GTTATGTGCTATCGTTGCG	1075
MS29F	CCTTGTCGAAGCTGGGGATC
MS29R	CACCGAGGGGAGGAGTTGTT	950
MS30F	AATCCCTTTGTTATTTGGC
MS30R	CAGTTGAGATCAGTCTCCC	201
MS34F	CTGTTTGATTCTTTTCCGTT
MS34R	CACCCTTCTCTCAGCCATGT	764
MS36F	CTTATTCTTCTTTTTTGCC
MS36R	CTTCAGGACCCGCTTCACT	201
MS15F	GAGAGAGAATGAGTTAGGG
MS15R	ACAGGACAGTGGTGGTTTG	1193
MS18F	TCATGATACGCTTCGAACG
MS18R	CGGTACTTCTACTACGCCC	369
MS19F	TTTTTGGTTGGTGACGACT
MS19R	TGTTTGAAAGGAAAGATGA	415
C3F	CCCATCCATCTTTCCCCTT
C3R	TCTACTGCCAACACAACT	742
C4F	CTTTGCTCTTTTCTTTCTTT
C4R	TCTACTGCCAACACAACT	1130
C5F	CCCATCCATCTTTCCCCTT
C5R	AGCTCGACAATTCTCTCA	714
MS16F	GAAGAGTGGGAATGTGGG
MS16R	TAGCAAGTCAAGGGGCTA	380
MS17F	CTGCTTTCTTTCCTTCTGG
MS17R	TCAATCGGCTACTGGTTCT	917
