# Supplementary material for: Comparative Analysis of orf182 Widespread in Chinese Wild Rice Species for Hybrid Rice Breeding
Source: Research Square preprint supplement (doi:10.21203/rs.3.rs-7649942/v1), 2025-11-05
Supplement: Supplementary file 5 [file f314116cfcd2605255cc9a28.xlsx]

## Sheet: Sheet1
1 18 76L 0
GX-1	GX-2	GX-3	GX-4	GX-5	GX-6	GX-7	GX-8	GX-9	GX-10	GX-11	GX-12	GX-13	GX-14	GX-15	GX-16	GX-17	GX-18	GX-19	GX-20	GX-21	GX-22	GX-23	GX-24	GX-25	GX-26	GX-27	GX-28	GX-29	GX-30	GX-31	GX-32	GX-33	GX-34	GX-35	GX-36	GX-37	GX-38	GX-39	GX-40	GX-41	GX-42	GX-43	GX-44	GX-45	GX-46	GX-47	GX-48	GX-49	GX-50
W-rc-46	W-rc-50	W-rc-19	W-rc-48	W-rc-41	W-rc-27	W-rc-21	W-rc-42	W-rc-32	W-rc-25	W-rc-23	W-rc-29	W-rc-40	W-rc-37	W-rc-39	W-rc-34	W-rc-24	W-rc-49	W-rc-20	W-rc-26	W-rc-44	W-rc-22	W-rc-35	W-rc-47	W-rc-36	W-rc-38	W-rc-45	W-rc-18	W-rc-33	W-rc-43	W-rc-28	W-rc-30	W-rc-31	W-rc-55	W-rc-52	W-rc-51	W-rc-54	W-rc-57	W-rc-56	W-rc-53	W-rc-65	W-rc-69	W-rc-63	W-rc-71	W-rc-72	W-rc-58	W-rc-62	W-rc-70	W-rc-73	W-rc-67
551	562	708	802	870	1006	1106	1119	1128	1149	1158	1162	1182	1211	1230	1238	1260	1271	1290	1300	1309	1319	1357	1367	1373	1380	1387	1393	1400	1431	1441	1510	1520	N567	N568	N570	N571	N573	N575	N576	K1	K10	K30	K40	K60	K70	K80	K90	K100	K110
1	1	1	1	1	1	1	1	1	1	1	1	1	1	1	1	1	1	1	1	1	1	1	1	1	1	1	1	1	1	1	1	1	1	1	1	1	1	1	1	1	1	1	1	1	1	1	1	1	1
1	1	1	1	1	1	1	1	1	1	1	1	1	1	1	1	1	1	1	1	1	1	1	1	1	1	1	1	1	1	1	1	1	1	1	1	1	1	1	1	1	1	1	1	1	1	1	1	1	1
1	1	1	1	1	1	1	1	1	1	1	1	1	1	1	1	1	1	1	1	1	1	1	1	1	1	1	1	1	1	1	1	1	1	1	1	1	1	1	1	1	1	1	1	1	1	1	1	1	1
1	1	1	1	1	1	1	1	1	1	1	1	1	1	1	1	1	1	1	1	1	1	1	1	1	1	1	1	1	1	1	1	1	1	1	1	1	1	1	1	0	0	0	0	0	0	0	0	0	0
1	1	1	1	1	1	1	1	1	1	1	1	1	1	1	1	1	1	1	1	1	1	1	1	1	1	1	1	1	1	1	1	1	1	1	1	1	1	1	1	0	0	0	0	0	0	0	0	0	0
0	0	1	1	1	1	0	1	1	1	1	1	1	1	1	1	1	1	1	1	1	1	1	1	1	1	1	1	1	1	1	1	1	1	1	1	1	0	0	0	0	0	0	0	0	0	0	0	0	0
1	1	1	1	1	1	1	1	1	1	1	1	1	1	1	1	1	1	1	1	1	1	1	1	1	1	1	1	1	1	1	1	1	1	1	1	1	1	1	1	0	0	0	0	0	1	0	0	0	0
0	0	0	1	0	0	0	0	0	0	0	0	0	0	0	0	0	0	0	0	0	0	0	0	0	0	0	0	0	0	0	0	0	0	0	0	0	0	0	0	0	0	0	0	0	0	0	0	0	0
0	0	0	0	0	0	0	0	0	0	0	0	0	0	0	0	0	0	0	0	0	0	0	0	0	0	0	0	0	0	0	0	0	0	0	0	0	0	0	0	0	0	0	0	0	0	0	0	0	0
0	0	0	0	0	0	0	0	0	0	0	0	0	0	0	0	0	0	0	0	0	0	0	0	0	0	0	0	0	0	0	0	0	0	0	0	0	0	0	0	0	0	0	0	0	0	0	0	0	0
0	0	0	0	0	0	0	0	0	0	0	0	0	0	0	0	0	0	0	0	0	0	0	0	0	0	0	0	0	0	0	0	0	0	0	0	0	0	0	0	0	0	0	0	0	0	0	0	0	0
0	0	0	1	0	0	0	0	0	0	0	0	0	0	0	0	0	0	0	0	0	0	0	0	0	0	0	0	0	0	0	0	0	0	0	0	0	0	0	0	0	0	0	0	0	0	0	0	0	0
0	0	0	1	0	0	0	0	0	0	0	0	0	0	0	0	0	0	0	0	0	0	0	0	0	0	0	0	0	0	0	0	0	0	0	0	0	0	0	0	0	0	0	0	0	1	0	0	0	0
0	0	0	1	0	0	0	0	0	0	0	0	0	0	0	0	0	0	0	0	0	0	0	0	0	0	0	0	0	0	0	0	0	0	0	0	0	0	0	0	0	0	0	0	0	0	0	0	0	0
1	1	1	1	1	1	1	1	1	1	1	1	1	1	1	1	1	1	1	1	1	1	1	1	1	1	1	1	1	1	1	1	1	1	1	1	1	1	1	1	0	0	0	0	0	1	0	0	0	0
1	1	1	1	1	1	1	1	1	1	1	1	1	1	1	1	0	1	1	1	1	0	1	1	1	1	1	0	1	1	1	1	1	0	1	1	0	1	1	1	1	1	1	1	0	1	0	1	1	0
0	0	0	0	0	0	0	0	0	0	0	0	0	0	0	0	0	0	0	0	0	0	0	0	0	0	0	0	0	0	0	0	0	0	0	0	0	0	0	0	0	0	0	0	0	0	0	0	0	0
0	0	0	1	0	0	0	0	0	0	0	0	0	0	0	0	0	0	0	0	0	0	0	0	0	0	0	0	0	0	0	0	0	0	0	0	0	0	0	0	0	0	0	0	0	0	0	0	0	0
[truncated: 26 more columns]
