# Supplementary material for: Comparative Analysis of orf182 Widespread in Chinese Wild Rice Species for Hybrid Rice Breeding
Source: Research Square preprint supplement (doi:10.21203/rs.3.rs-7649942/v1), 2025-11-05
Supplement: Supplementary file 6 [file feb16df5d625b9e6dfd08f0d.xlsx]

## Sheet: short_read
Accession	Long reads number	Long reads length	Short reads number	Short reads length
GD4	31939	165097912	43762236	6564335400
GD5	7260	58505969	36631472	5494720800
GD7	3873	23683012	44651674	6697751100
GD9	3980	24104451	57116986	8567547900
GX4	27849	283337534	37310724	5596608600
GX34	16081	96588091	39861690	5979253500
GX44	2401	17714402	36246702	5437005300
GX46	6975	52495056	48154340	7223151000
GX51	2399	17684577	43245552	6486832800
JX2	20117	146941123	34718120	5207718000
JX5	28301	288829602	42481688	6372253200
